# Supplementary material for: Whole-head recording of chemosensory activity in the marine annelid Platynereis dumerilii
Source: PubMed Central journal article supplement (PMC6223215; doi:10.1098/rsob.180139), 2018-10-31
Supplement: rsob180139supp1.pdf [file rsob180139supp1.pdf]

Supplementary material for :

Chartier TF, Deschamps J, Dürichen W, Jékely G, Arendt D 2018, Whole-head recording of chemosensory activity in the marine annelid *Platynereis dumerilii*, *Open Biology* (doi: 10.1098/rsob.20180139)

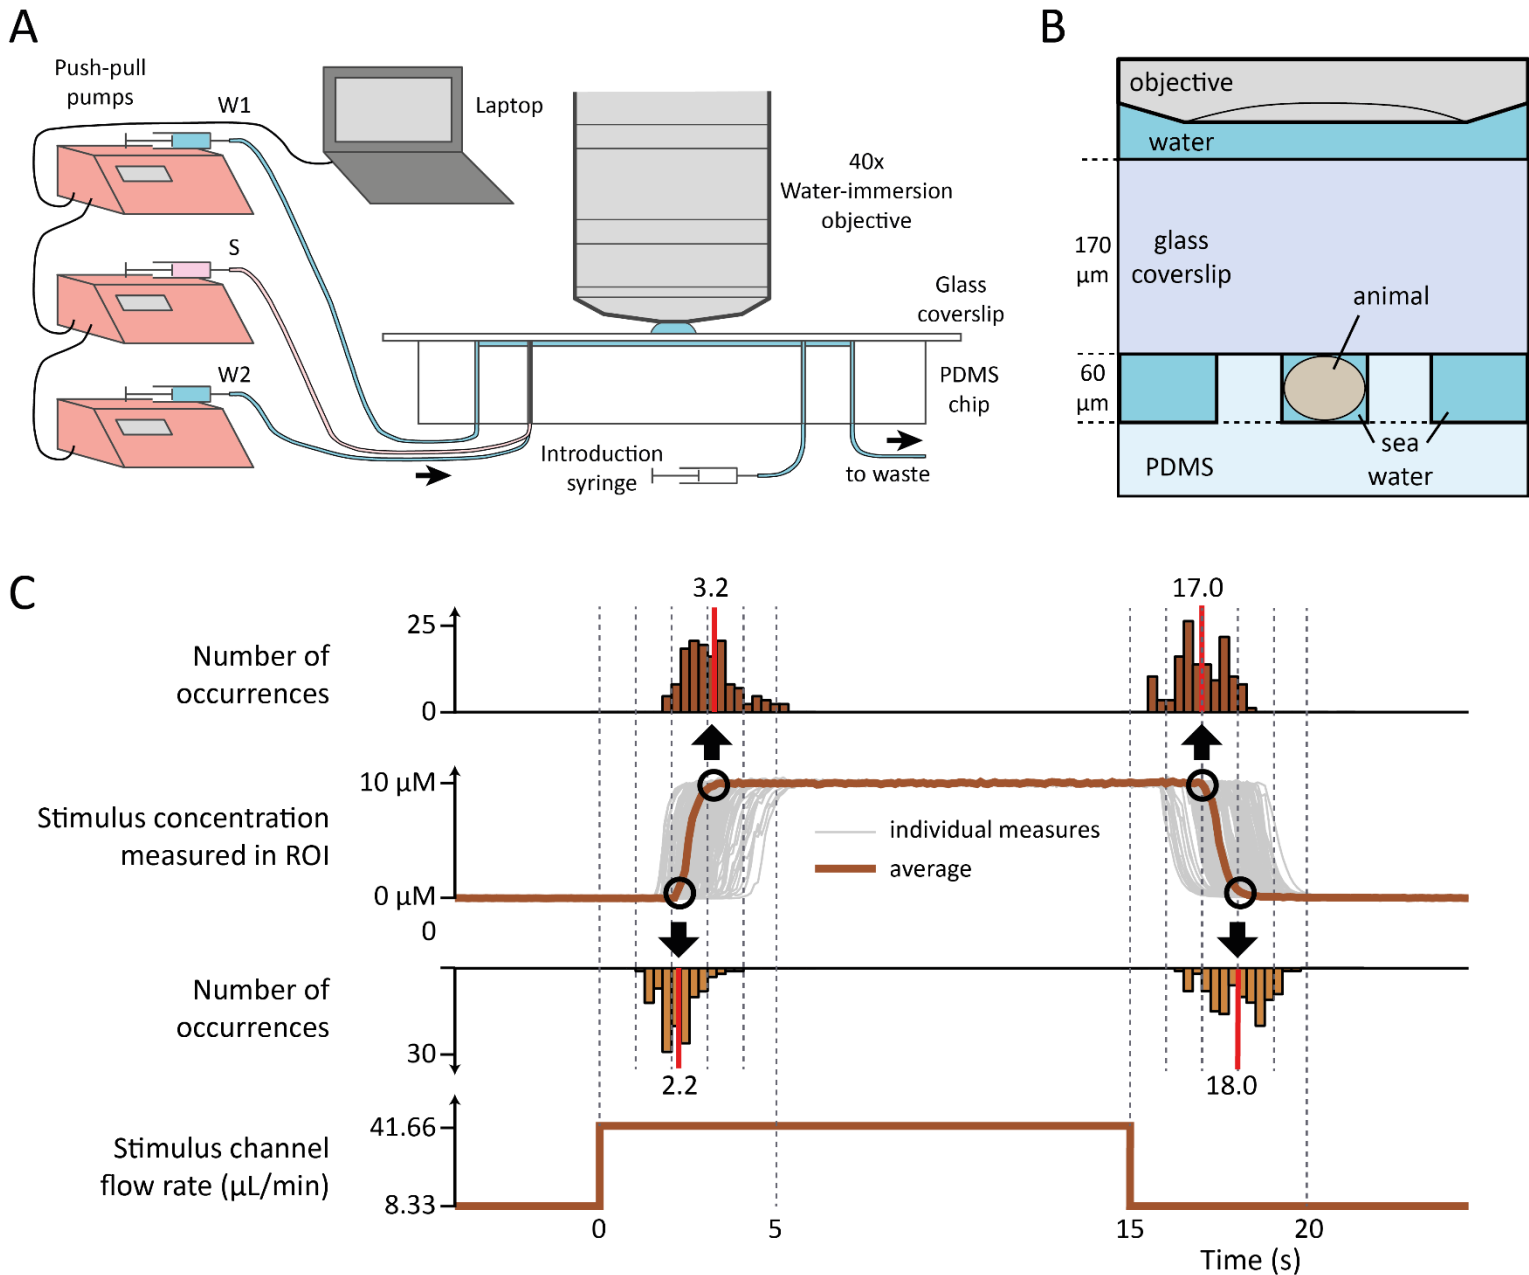

Figure S1

**Additional descriptions of the experimental setup.** (A) General schematic showing computer-controlled pumps, tubings and position of the device under the objective. (B) Detail of the mounting: cross-section through the microfluidic trap, illustrating the chamber's height compared to the coverslip thickness. (C) Quantification of stimulant concentration over time, as estimated by transmitted light intensity, measured in a square area located immediately upstream of the animal's head (see Figure 1G). Multiple measurements are shown as grey curves and their average as a thick brown curve. Distributions of the times of occurrence are shown for the four edges of the experimental curves (black circles), which correspond to beginning and end of stimulus onsets and offsets.

acetylated tubulin /  
DAPI / mCling

schematic views

acetylated tubulin /  
DAPI / mCling

schematic views

A1 Nuchal cell masses

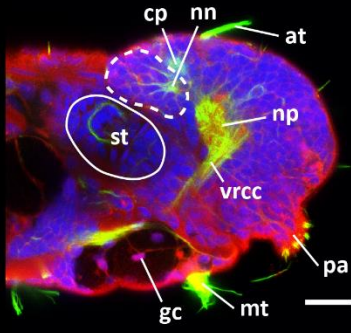

A2

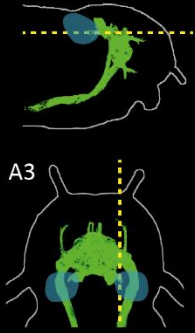

A3

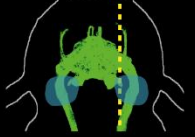

F1 MB dorsal regions

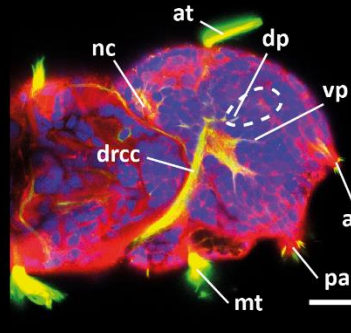

F2

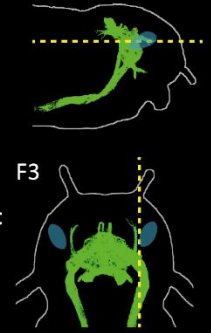

F3

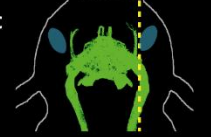

B1 Palpal cell masses

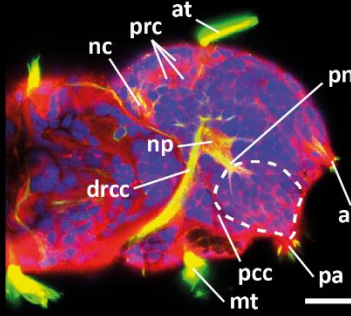

B2

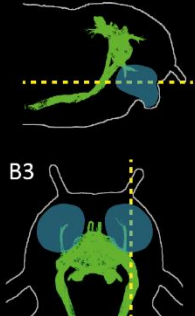

B3

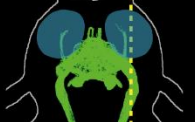

G1 MB ventral regions

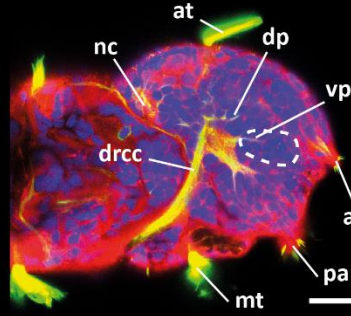

G2

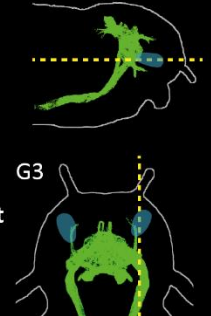

G3

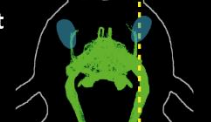

C1 Antennal cell masses

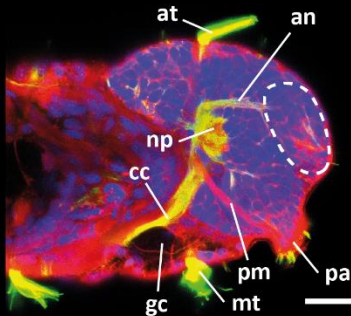

C2

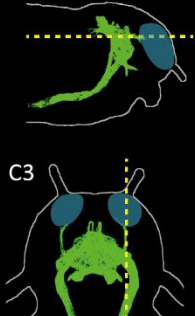

C3

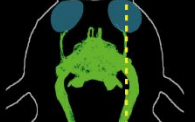

H1 Pair of apical organ cells

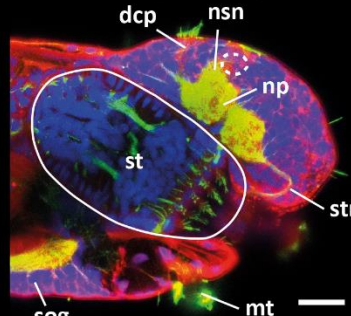

H2

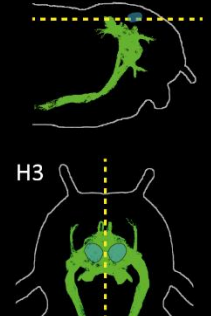

H3

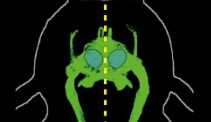

D1 Cirral cell masses

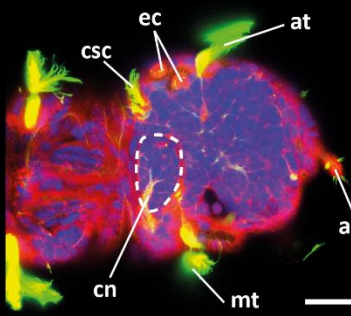

D2

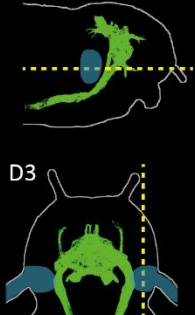

D3

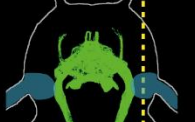

I1 Pair of eyefront cells

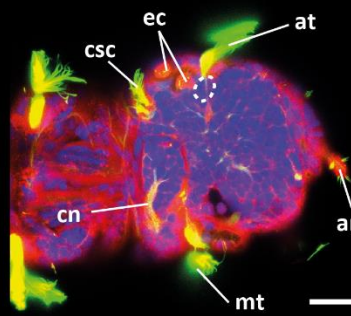

I2

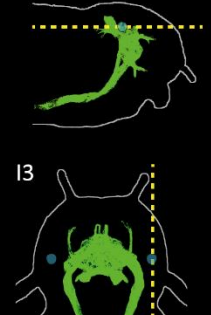

I3

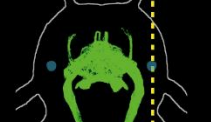

E1 Lateral regions

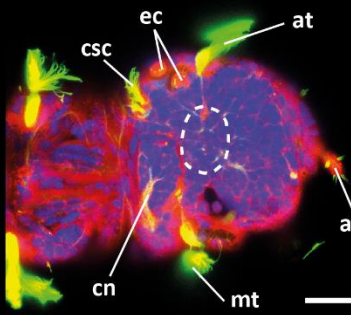

E2

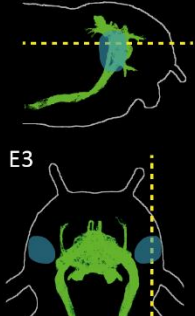

E3

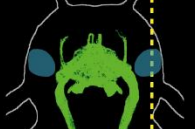

J1 Pair of fronto-dorsal cells

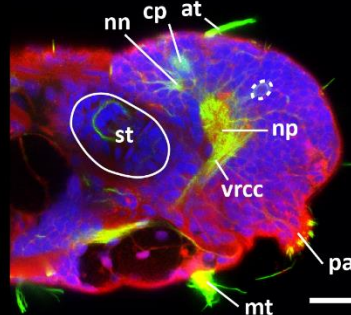

J2

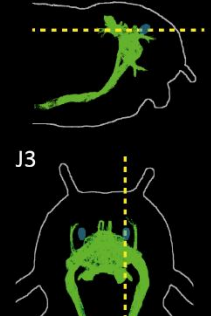

J3

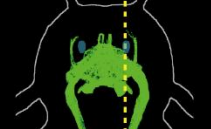

## Figure S2 (previous page)

**Anatomical stainings in lateral view, showing the head regions active in the context of chemical stimulations. (A1, B1, ... J1)** Acetylated tubulin immunostaining (green), counterstained for nuclear DNA (DAPI, blue) and membranes (mCling, red), averaged over several consecutive confocal planes. The approximate boundaries of the active regions are indicated by white dashed lines, the outlines of the stomodeum by white solid lines. an: antennal nerve; ant: antenna; cn: cirral nerve; dp: dorsal peduncle of the mushroom bodies; nc: nuchal cavity; nn: nuchal nerve; np: main neuropil; nsn: neurosecretory neuropil; pa: palp; pn: palpal nerve; prc: photo-receptor cells; vp: ventral peduncle of the mushroom bodies. Further abbreviations: see abbreviations list. Scale bars: 20  $\mu\text{m}$ . **(A2, B2, ... J2)** Schematic representation of the head in lateral view, showing its outlines (grey), a thresholded maximum projection of the nervous fibres (green) and the area containing the cell bodies of the corresponding region (shaded blue). The position of the horizontal plane shown in the corresponding images in Figure 2 is indicated by a yellow dashed line. **(A3, B3, ... J3)** Same in dorsal view. The position of the sagittal plane shown in the adjacent anatomical staining is indicated by a yellow dashed line.

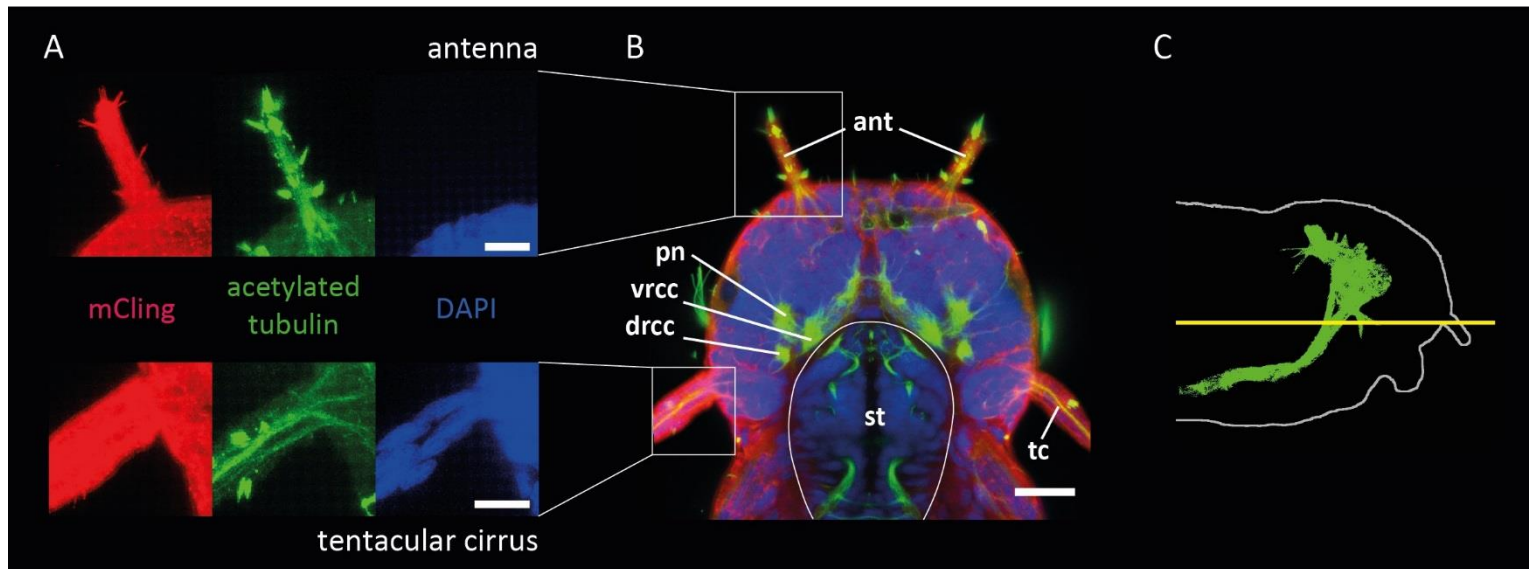

## Figure S3

**Anatomical details of the antennae and tentacular cirri at 6dpf. (A)** Close-up of head appendages, showing that cell bodies (DAPI nuclear DNA staining, blue) are present in the appendage of the tentacular cirrus (bottom), but not of the antenna (top). Both appendages contain membrane extensions (mCling membrane staining, red), nervous fibres and clusters of sensory cilia (acetylated tubulin immunostaining, green). **(B)** Head overview in a horizontal plane. The outlines of the stomodeum are indicated by white solid lines. ant: antennae; pn: palpal nerve; st: stomodeum; tc: tentacular cirrus. Further abbreviations: see abbreviations list. **(C)** Schematic representation of the head in lateral view, showing its outline (grey), a maximum projection of the nervous fibres (green). The position of the horizontal plane shown in **(B)** is indicated by a yellow solid line. Scale bars: 10  $\mu\text{m}$  in **(A)**, 20  $\mu\text{m}$  in **(B)**.

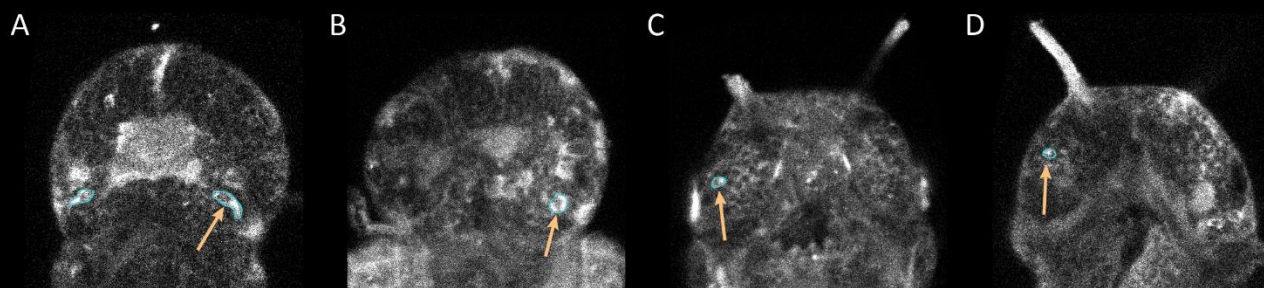

Animal #21      Animal #82      Animal #17      Animal #24

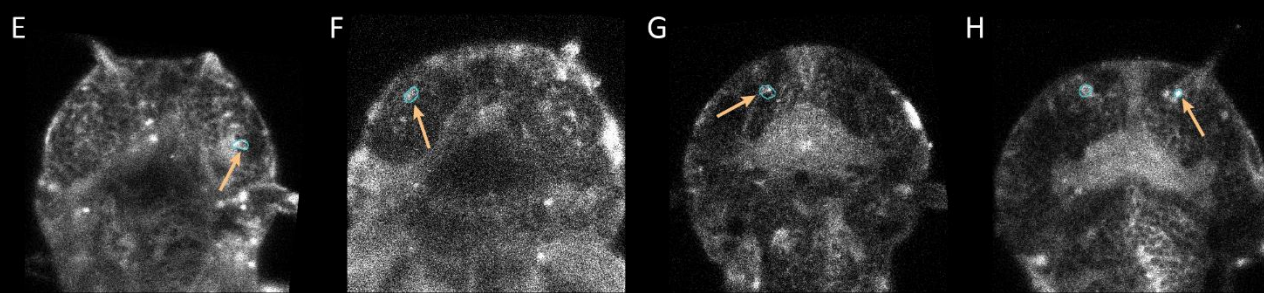

Animal #34      Animal #82      Animal #97      Animal #74

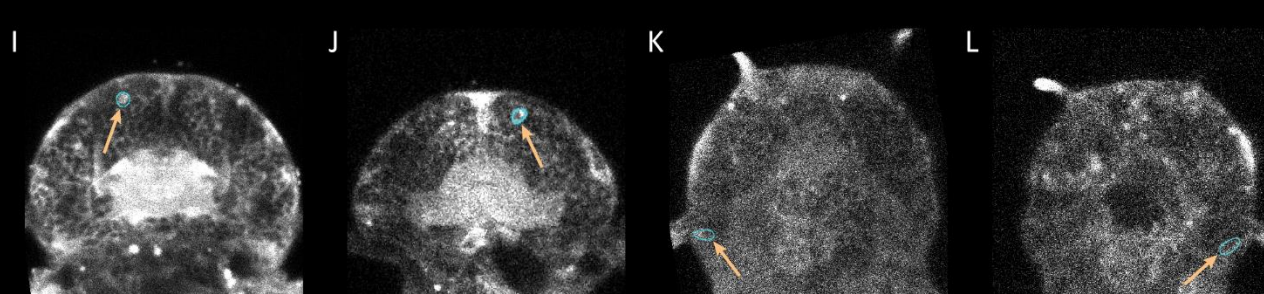

Animal #33      Animal #86      Animal #14      Animal #22

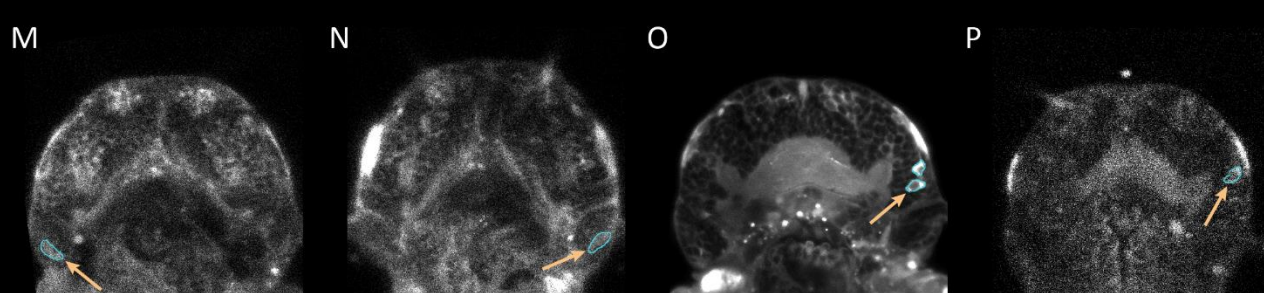

Animal #33      Animal #84      Animal #113      Animal #22

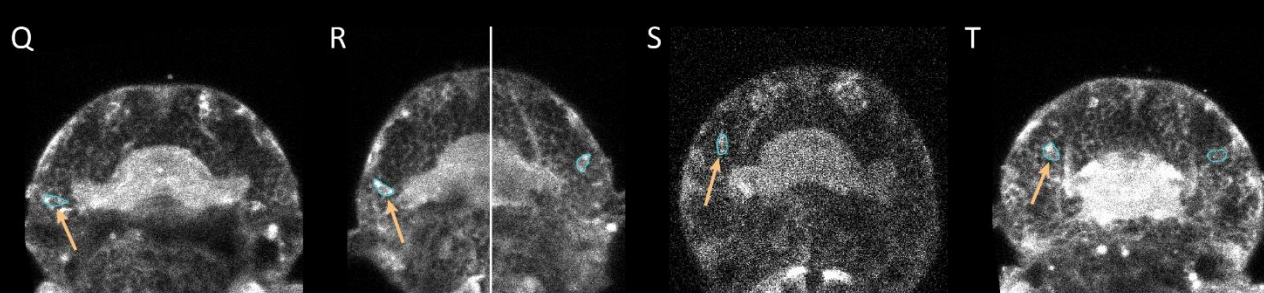

Animal #33      Animal #37      Animal #21      Animal #33

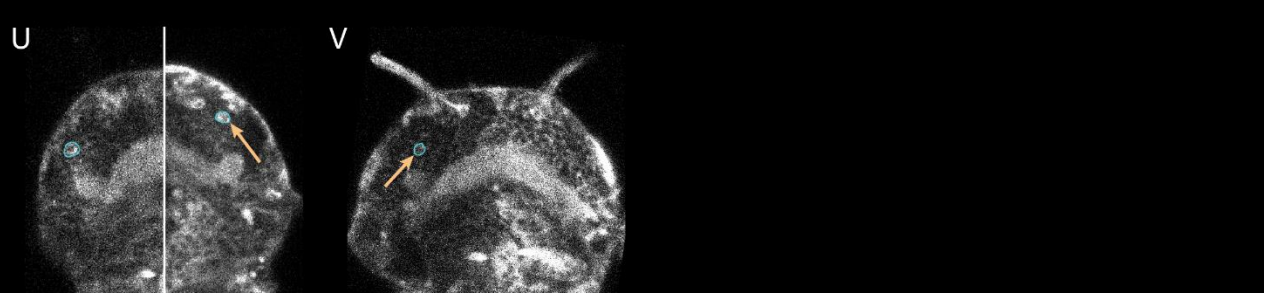

Animal #15      Animal #87

## Figure S4 (previous page)

**Calcium snapshots and regions of interest used to generate the calcium traces shown in Figure 3C.** GCaMP6s signal in single confocal planes, averaged over several consecutive time points. Individual responsive cell bodies are circled in cyan; the orange arrows point at the cells whose trace is shown in Figure 3C. **(A-B)** nuchal cell masses, **(C-F)** palpal cell masses, **(G-J)** antennal cell masses, **(K-N)** cirral cell masses, **(O-R)** lateral regions, **(S-T)** MB dorsal regions, **(U-V)** MB ventral regions.

## Figure S5 (next page)

**Calcium snapshots and regions of interest used to generate the calcium traces shown in Figure 5.** GCaMP6s signal in single confocal planes, averaged over several consecutive time points. Individual cell bodies or neuropils whose trace are shown in Figure 5A or 5C are indicated by an orange arrow. The insets in **(E)** and **(H)** are taken from a neighbouring confocal plane. **(A-H)** apical organ cells and neurosecretory neuropil (nsn), **(I-K)** eyefront cells, **(L-Q)** fronto-dorsal cells.

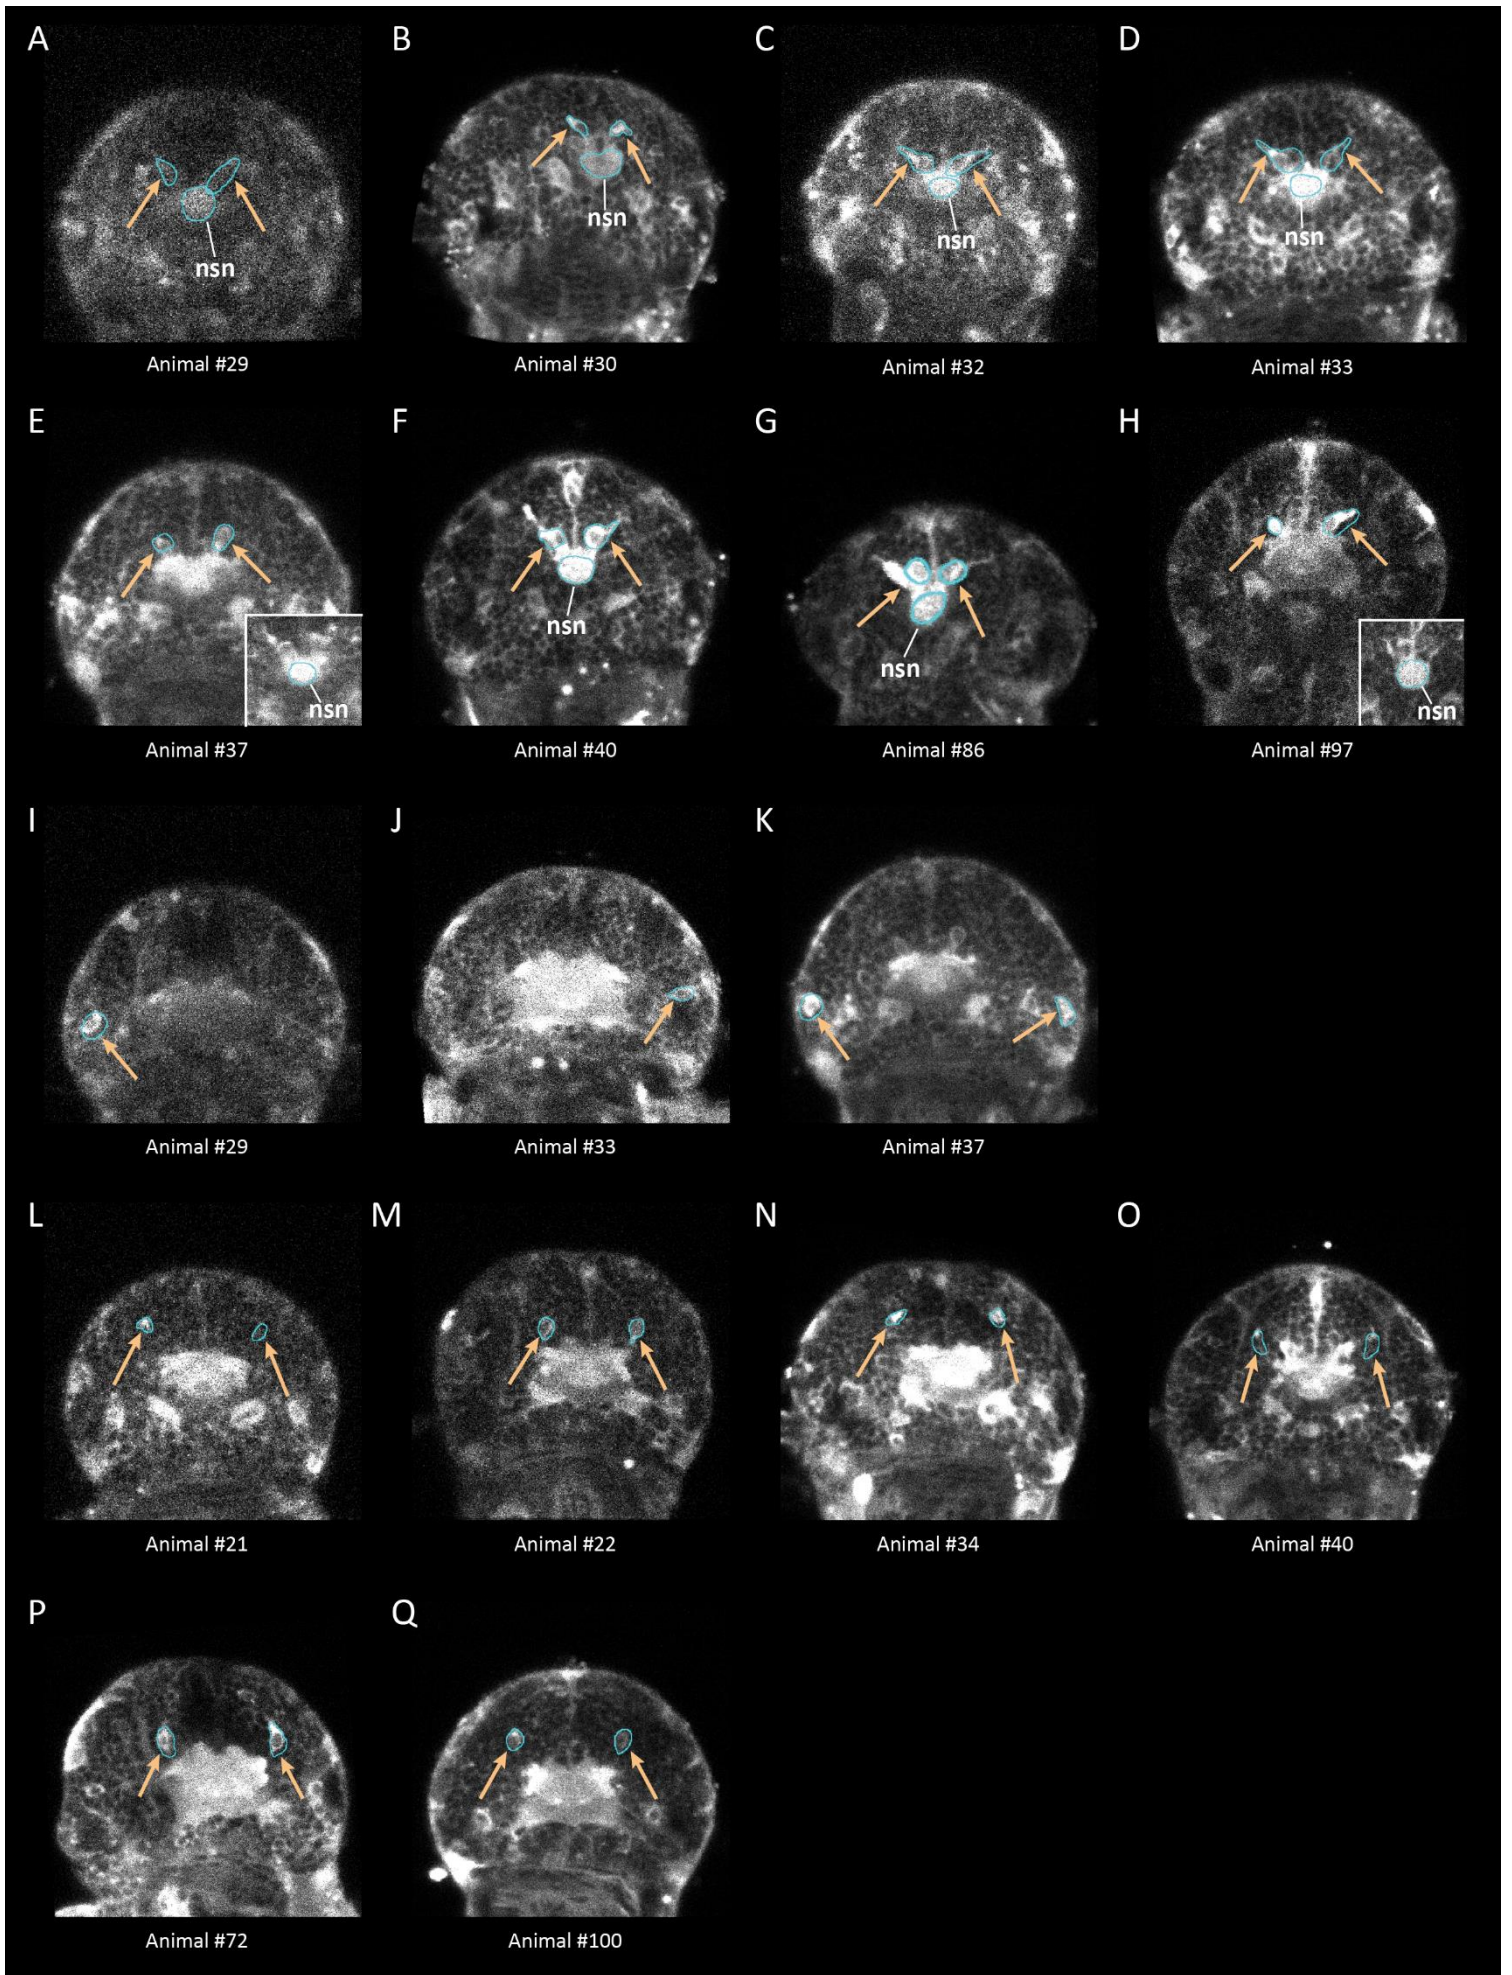

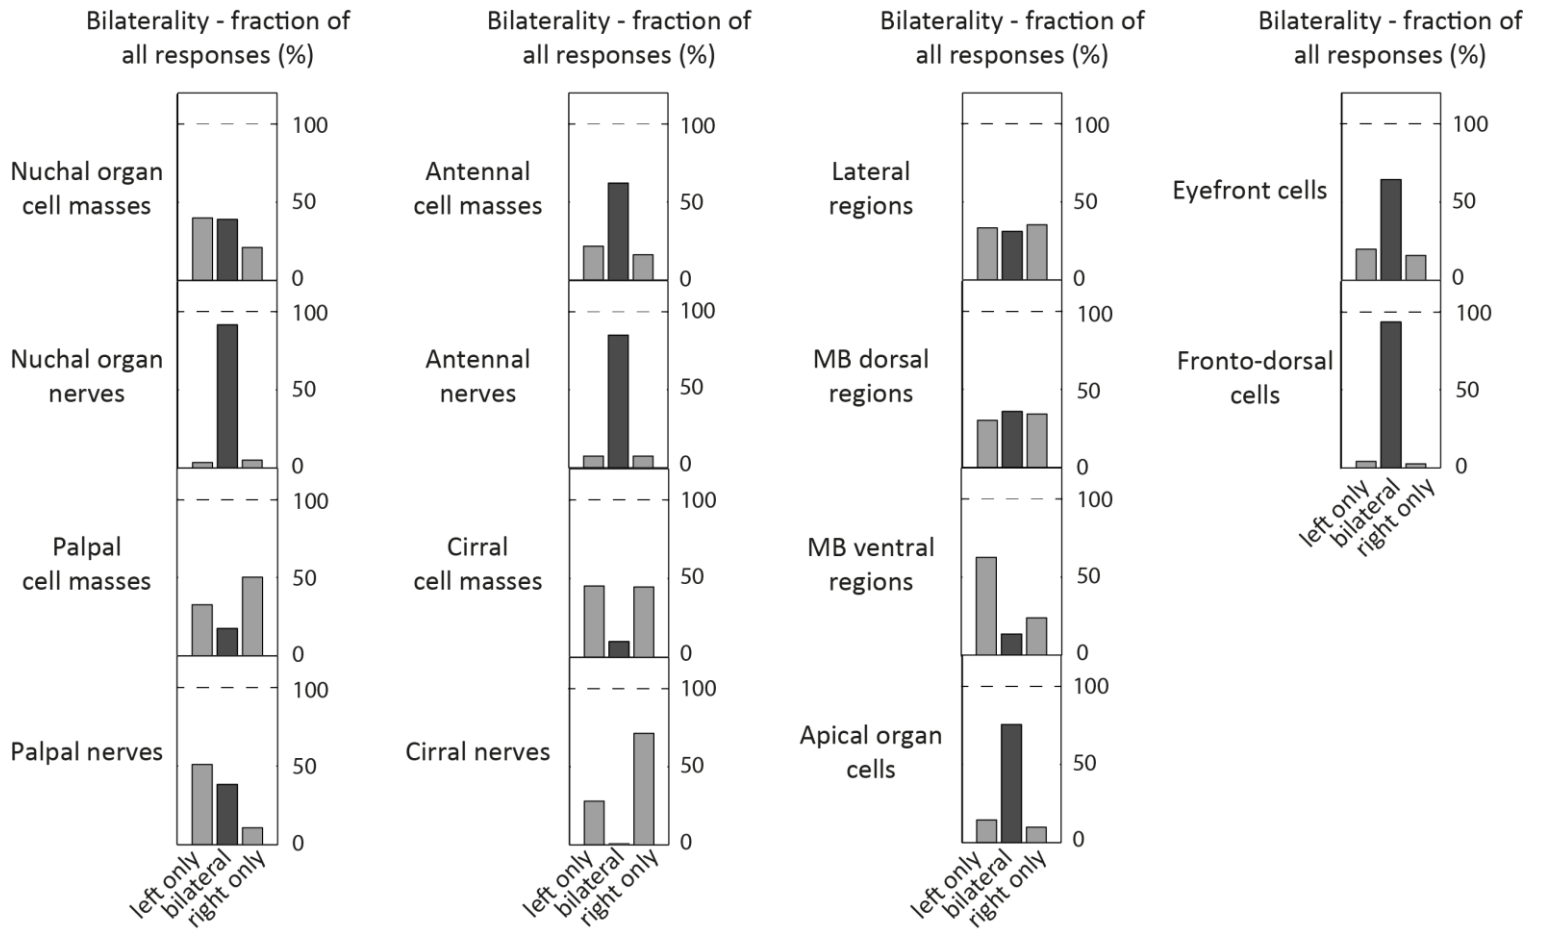

**Figure S6**

Quantification of response bilaterality for each region.

|                  | groups compared |              | difference between group means | p-value | 95% confidence interval of the true difference of means |             |
|------------------|-----------------|--------------|--------------------------------|---------|---------------------------------------------------------|-------------|
|                  |                 |              |                                |         | lower limit                                             | upper limit |
| Nuchal organs    | 1-butanol       | amyl acetate | -1,6488                        | 0,9984  | -29,0253                                                | 25,7277     |
|                  | 1-butanol       | glutamate    | 9,1537                         | 0,801   | -18,2228                                                | 36,5302     |
|                  | 1-butanol       | sucrose      | -8,2625                        | 0,845   | -35,6391                                                | 19,114      |
|                  | amyl acetate    | glutamate    | 10,8025                        | 0,6898  | -15,7567                                                | 37,3616     |
|                  | amyl acetate    | sucrose      | -6,6138                        | 0,9054  | -33,1729                                                | 19,9454     |
|                  | glutamate       | sucrose      | -17,4162                       | 0,302   | -43,9754                                                | 9,1429      |
| Antennae         | 1-butanol       | amyl acetate | 11,4198                        | 0,7255  | -18,2804                                                | 41,1199     |
|                  | 1-butanol       | glutamate    | 9,9868                         | 0,7983  | -19,7133                                                | 39,6869     |
|                  | 1-butanol       | sucrose      | 14,3519                        | 0,5628  | -15,3483                                                | 44,052      |
|                  | amyl acetate    | glutamate    | -1,433                         | 0,9991  | -30,2463                                                | 27,3804     |
|                  | amyl acetate    | sucrose      | 2,9321                         | 0,9925  | -25,8813                                                | 31,7454     |
|                  | glutamate       | sucrose      | 4,3651                         | 0,9761  | -24,4483                                                | 33,1784     |
| Palps            | 1-butanol       | amyl acetate | -9,2959                        | 0,9321  | -51,5404                                                | 32,9485     |
|                  | 1-butanol       | glutamate    | -37,788                        | 0,0926  | -80,0324                                                | 4,4564      |
|                  | 1-butanol       | sucrose      | -15,0279                       | 0,7698  | -57,2723                                                | 27,2166     |
|                  | amyl acetate    | glutamate    | -28,4921                       | 0,2543  | -69,4752                                                | 12,4911     |
|                  | amyl acetate    | sucrose      | -5,7319                        | 0,981   | -46,715                                                 | 35,2512     |
|                  | glutamate       | sucrose      | 22,7601                        | 0,4455  | -18,223                                                 | 63,7433     |
| Tentacular cirri | 1-butanol       | amyl acetate | 9,9916                         | 0,895   | -28,5666                                                | 48,5497     |
|                  | 1-butanol       | glutamate    | -31,6707                       | 0,1377  | -70,2288                                                | 6,8875      |
|                  | 1-butanol       | sucrose      | -10,5331                       | 0,8796  | -49,0913                                                | 28,025      |
|                  | amyl acetate    | glutamate    | -41,6623                       | 0,0244  | -79,0692                                                | -4,2554     |
|                  | amyl acetate    | sucrose      | -20,5247                       | 0,456   | -57,9316                                                | 16,8822     |
|                  | glutamate       | sucrose      | 21,1376                        | 0,4304  | -16,2693                                                | 58,5445     |
|                  |                 |              | p-value > 0.05                 |         |                                                         |             |
|                  |                 |              | p-value < 0.05                 |         |                                                         |             |

**Table S1**

**Multiple comparison test based on one-way ANOVA, for differential responses to stimulants.**
